# Supplementary material for: Mechanical Properties and Tensile Model of Hemp-Fiber-Reinforced Poly(butylene adipate-co-terephthalate) Composite
Source: MDPI journal article supplement (doi:10.3390/ma15072445), 2022-03-26
Supplement: s1 [file s1]

Supplementary

# Mechanical Properties and Tensile Model of Hemp-Fiber-Reinforced Poly (Butylene Adipate-Co-Terephthalate) Composite

Deyong Zeng <sup>1,2</sup>, Liang Zhang <sup>1,2</sup>, Shaojin Jin <sup>3</sup>, Youyuan Zhang <sup>3</sup>, Cuicui Xu <sup>3</sup>, Kai Zhou <sup>3</sup> and Weihong Lu <sup>1,2,3\*</sup>

<sup>1</sup> School of Medicine and Health, Harbin Institute of Technology, Harbin 150001, China; 18b925086@stu.hit.edu.cn (D.Z.); 19s025072@stu.hit.edu.cn (L.Z.);

<sup>2</sup> National and Local Joint Engineering Laboratory for Synthesis, Transformation and Separation of Ex-treme Environmental Nutrients, Harbin 150001, China

<sup>3</sup> Shandong Hagong Biological Technology Co. Ltd., Jinan 250200, China; jinsj@hitrobotgroup.com (S.J.); zhangyouyuan@hitrobotgroup.com (Y.Z.); xucc@hitrobotgroup.com (C.X.); zhouk@hitrobotgroup.com (K.Z.)

\* Correspondence: lwh@hit.edu.cn; Tel.: +86-188-4587-0641

**Citation:** Zeng, D.; Zhang, L.; Jin, S.; Zhang, Y.; Xu, C.; Zhou, K.; Lu, W. Mechanical Properties and Tensile Model of Hemp-Fiber-Reinforced Poly (Butylene Adipate-Co-Terephthalate) Composite. *Materials* **2022**, *15*, 2445.

<https://doi.org/10.3390/ma15072445>

Academic Editor: Debora Puglia

Received: 24 February 2022

Accepted: 25 March 2022

Published: 26 March 2022

**Publisher's Note:** MDPI stays neutral with regard to jurisdictional claims in published maps and institutional affiliations.

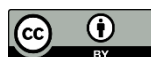

**Copyright:** © 2022 by the authors. Licensee MDPI, Basel, Switzerland. This article is an open access article distributed under the terms and conditions of the Creative Commons Attribution (CC BY) license (<https://creativecommons.org/licenses/by/4.0/>).

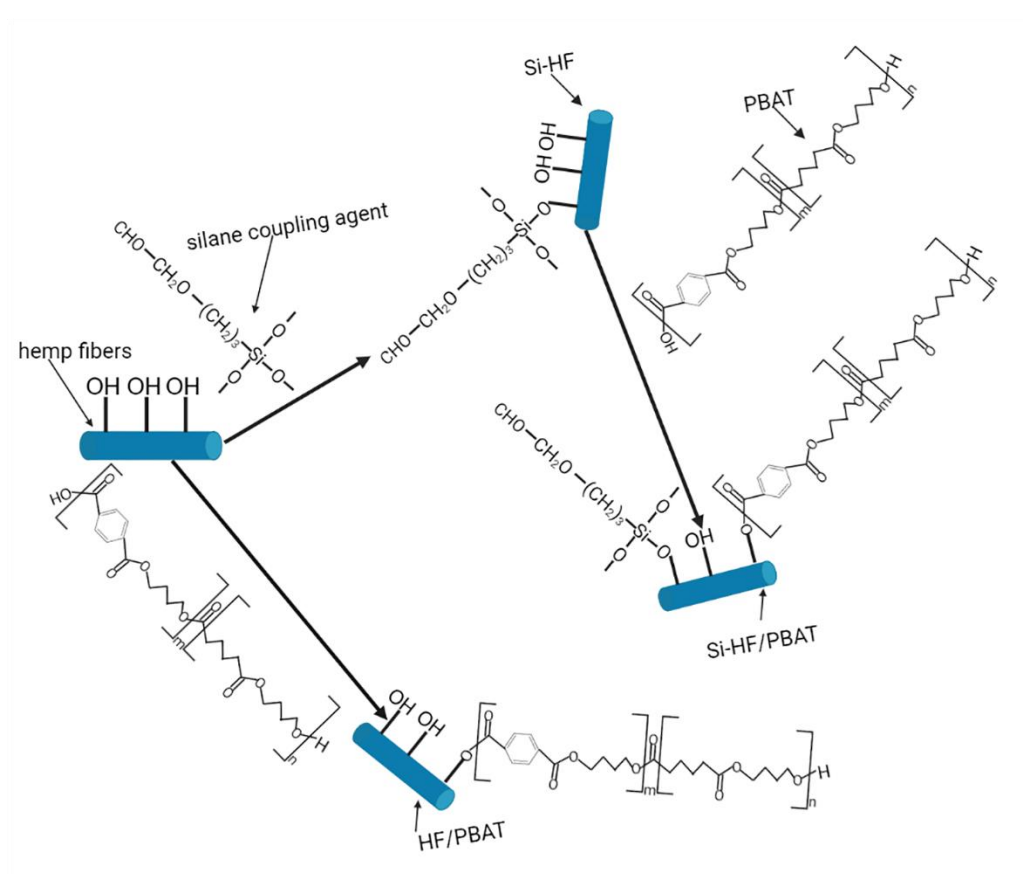

**Figure S1.** Synthesis mechanism of hemp fiber/PBAT composites.
